# Supplementary material for: In utero exposure to chlordecone affects histone modifications and activates LINE-1 in cord blood
Source: Life Sci Alliance. 2021 Apr 9;4(6):e202000944. doi: 10.26508/lsa.202000944 (PMC8091598; doi:10.26508/lsa.202000944)
Supplement: Supplementary file 1 [file LSA-2020-00944_TableS1.xls]

## Sheet: Feuil1
chr	start	end	Low	High	FC	pval	FDR	Gene1	Distance to TSS	Gene2	Distance to TSS	Gene3	Distance to TSS
chr1	1599182	1600846	10044	15899	1.58	0.00315	0.00375	FNDC10	82
chr1	9942479	9944005	18092	11690	-1.55	0.000302	0.000713	NMNAT1	-186	LZIC	87
chr1	19643692	19645376	11868	18511	1.56	0.00696	0.00762	HTR6	-20753	NBL1	1302
chr1	22024230	22026280	17472	11554	-1.51	0.000371	0.000799	CDC42	-27372	CELA3A	23599
chr1	22142201	22143898	6499	12110	1.86	0.0034	0.00402	WNT4	-84
chr1	23958784	23960933	23435	14819	-1.58	9.52e-05	0.000409	PNRC2	47
chr1	26692322	26693870	10834	6550	-1.65	0.000761	0.00121	ARID1A	-2937
chr1	28642151	28643818	16048	10490	-1.53	0.000265	0.000659	TAF12	20
chr1	31063683	31066230	25047	15326	-1.63	2.6e-05	0.000372	PUM1	738
chr1	32649966	32652279	22381	14391	-1.56	6.07e-05	0.000372	ZBTB8OS	-539	RBBP4	-25
chr1	33126591	33127953	9235	5832	-1.58	0.00701	0.00765	AZIN2	45022	TRIM62	54394
chr1	35030530	35032076	18149	10907	-1.66	0.000131	0.000455	ZMYM6	665
chr1	36223212	36225670	20928	12726	-1.64	0.000235	0.000618	THRAP3	25
chr1	38044858	38047743	17388	26544	1.53	0.00148	0.00197	POU3F1	493
chr1	40530977	40532252	10314	6712	-1.54	0.0024	0.00295	ZNF684	54
chr1	45550443	45551826	11556	7453	-1.55	0.00231	0.00286	AKR1A1	592
chr1	45685158	45688863	40055	25157	-1.59	3.58e-05	0.000372	GPBP1L1	-381	TMEM69	-203
chr1	52403661	52405576	17949	11728	-1.53	0.000141	0.000469	ORC1	-160	PRPF38A	55
chr1	62783508	62785182	14061	9174	-1.53	0.000666	0.00111	ATG4C	210
chr1	63522623	63524090	14825	8995	-1.65	0.000661	0.00111	ITGB3BP	-163	EFCAB7	-33
chr1	66331587	66337423	34618	16964	-2.04	5.74e-05	0.000372	SGIP1	-199777	PDE4B	541991
chr1	66929654	66931948	21588	14012	-1.54	2.71e-05	0.000372	MIER1	5842	SLC35D1	123298
chr1	67430329	67431518	13526	8601	-1.57	0.000197	0.000565	SERBP1	-538
chr1	70204822	70206371	15005	9874	-1.52	0.000369	0.000799	SRSF11	-127	LRRC40	23
chr1	71079984	71081637	15447	8374	-1.84	5.25e-05	0.000372	ZRANB2	486
chr1	74197693	74199130	11603	6772	-1.71	0.000898	0.00134	LRRIQ3	-225	FPGT-TNNI3K	177	FPGT	200
chr1	75785790	75788232	13221	6758	-1.96	0.000336	0.000755	RABGGTB	810
chr1	77218753	77219973	11500	7128	-1.61	0.000372	0.000799	PIGK	63
chr1	77977545	77979917	22999	12667	-1.82	1.68e-05	0.000372	FUBP1	355
chr1	84478978	84480375	14352	9257	-1.55	0.00044	0.000861	RPF1	410
chr1	84504637	84507250	27752	18395	-1.51	5.42e-06	0.000372	GNG5	621
chr1	88890259	88892194	20909	12322	-1.7	2.66e-05	0.000372	GTF2B	391
chr1	91500340	91501904	19687	12858	-1.53	0.000339	0.000759	CDC7	14
chr1	93078602	93080445	18376	12022	-1.53	0.000144	0.000473	MTF2	286
chr1	93345111	93348641	33852	20910	-1.62	6.31e-06	0.000372	DR1	988
chr1	95072143	95073568	9886	6143	-1.61	0.000705	0.00115	ALG14	89
chr1	100538740	100540322	13324	21303	1.6	0.00482	0.00545	VCAM1	-180229	GPR88	1394
chr1	101025064	101026745	15451	10085	-1.53	0.00088	0.00132	DPH5	-133
chr1	103525707	103526846	10847	7212	-1.5	0.00214	0.00268	RNPC3	578
chr1	109075267	109076398	9528	6065	-1.57	0.00342	0.00402	TAF13	169
chr1	109090258	109092048	17388	11129	-1.56	0.000379	0.000812	KIAA1324	-22848	TMEM167B	1350
chr1	110872554	110876239	35398	18274	-1.94	2.88e-05	0.000372	CD53	1243	LRIF1	89682
chr1	110963044	110964907	16773	10759	-1.56	0.000873	0.00131	LRIF1	103
chr1	114715943	114717114	10115	6495	-1.56	0.00309	0.0037	NRAS	365
chr1	145926406	145927994	11238	6809	-1.65	0.00153	0.00203	ENSG00000280778	-58	RBM8A	336
chr1	145963912	145965438	10780	6554	-1.64	0.00261	0.00316	POLR3GL	-28
chr1	145992523	145998335	63232	36154	-1.75	0.000101	0.000415	TXNIP	1171	POLR3GL	30726
chr1	149884320	149886258	16075	9200	-1.75	0.000855	0.0013	BOLA1	-2601	HIST2H2AC	-1686	HIST2H2BE	1363
chr1	149887319	149889140	10842	7133	-1.52	0.00654	0.0072	HIST2H2BE	-1578	HIST2H2AB	-314	BOLA1	340
chr1	149926938	149928724	14874	9111	-1.63	0.00012	0.000443	SF3B4	513
chr1	150066781	150068304	15801	10356	-1.53	0.0011	0.00156	VPS45	231
chr1	150321273	150322412	11751	7649	-1.54	0.00178	0.0023	PRPF3	367
chr1	150363458	150365643	25068	14451	-1.73	6.35e-05	0.000372	RPRD2	-160
chr1	150486954	150488138	11599	7068	-1.64	0.00101	0.00146	TARS2	129
chr1	150574397	150580330	65588	39603	-1.66	5.49e-05	0.000372	MCL1	2226	ADAMTSL4	27995
chr1	150628485	150630013	10837	6893	-1.57	0.00128	0.00175	ENSA	327
chr1	150925880	150927022	10024	6293	-1.59	0.00122	0.00169	SETDB1	112
chr1	151005551	151007110	10628	6596	-1.61	0.00456	0.00519	PRUNE1	-2146	MINDY1	2044
chr1	151156332	151158060	14931	9492	-1.57	0.000749	0.0012	TNFAIP8L2	567
chr1	151189230	151190421	11890	7924	-1.5	0.00342	0.00402	VPS72	332
chr1	151254449	151255581	11899	7503	-1.59	0.000543	0.000977	PSMD4	306
chr1	151326471	151328416	18328	11720	-1.56	0.000168	0.000512	PI4KB	213
chr1	151346259	151347827	9599	5842	-1.64	0.00141	0.0019	RFX5	208
chr1	152034289	152037309	21968	13596	-1.62	0.0013	0.00177	S100A10	-41409	S100A11	1236
chr1	153669963	153671885	13102	8099	-1.62	0.00104	0.0015	ILF2	124
chr1	153966696	153968579	13771	9080	-1.52	0.000617	0.00106	SLC39A1	-4163	CREB3L4	-265
chr1	153990445	153991876	11281	7324	-1.54	0.00123	0.0017	RAB13	-4809	RPS27	402
chr1	154954584	154956748	13762	8872	-1.55	0.00185	0.00235	PBXIP1	438
chr1	154973568	154975827	19635	12432	-1.58	0.000596	0.00103	SHC1	-3951	CKS1B	-1
chr1	155910448	155911763	11158	6902	-1.62	0.000844	0.00129	RIT1	-191
chr1	160342120	160344145	25496	16959	-1.5	6.89e-05	0.000372	NCSTN	-139	COPA	115
chr1	160707026	160712194	31518	19112	-1.65	0.00163	0.00215	SLAMF1	-62652	CD48	2221
chr1	161044459	161046677	25073	16395	-1.53	0.000176	0.000531	USF1	409
chr1	161153312	161154535	11519	7198	-1.6	0.000898	0.00134	UFC1	172
chr1	161398909	161400635	17166	11106	-1.55	0.000349	0.000772	FCGR2A	-105658	CFAP126	-31898
chr1	161765259	161767299	18289	9321	-1.96	0.0002	0.000565	ATF6	-15
chr1	163321176	163322789	13740	9143	-1.5	0.000991	0.00145	NUF2	29
chr1	165768139	165769758	16338	10207	-1.6	0.000114	0.000437	TMCO1	-27
chr1	169367243	169368897	16273	9345	-1.74	0.000324	0.000735	NME7	-103	BLZF1	100
chr1	169707351	169712145	26026	11177	-2.33	0.000216	0.000587	SELP	-79636	SELL	1950
chr1	169794210	169795671	16002	9332	-1.71	0.000149	0.00048	METTL18	25
chr1	171484795	171486935	21621	14148	-1.53	4.23e-05	0.000372	PRRC2C	309
chr1	172531696	172534559	29445	19248	-1.53	7.64e-05	0.000382	SUCO	779
chr1	173714567	173716064	15179	9835	-1.54	0.00205	0.00258	KLHL20	332
chr1	173823403	173825393	17830	11352	-1.57	9.81e-05	0.000409	DARS2	-105	CENPL	-76
chr1	182588396	182589468	10198	6615	-1.54	0.00427	0.00489	RNASEL	324
chr1	185155759	185158387	29924	19942	-1.5	2.11e-05	0.000372	TRMT1L	-92	SWT1	-86
chr1	186374195	186376528	24977	16643	-1.5	4.99e-05	0.000372	C1orf27	-507	TPR	-37
chr1	192807811	192811844	28988	16729	-1.73	0.00181	0.00232	RGS2	787
chr1	193121368	193123145	14722	9012	-1.63	8.61e-05	0.000394	CDC73	240
chr1	198934243	198937604	18969	9381	-2.02	0.000322	0.000735	ATP6V1G3	-395250
chr1	203795190	203796953	11008	6595	-1.67	0.00111	0.00157	ZBED6	358	ZC3H11A	377
chr1	204407286	204412293	59140	35953	-1.64	0.000103	0.000416	GOLT1A	-195698	PPP1R15B	2001
chr1	205121006	205123074	18015	11481	-1.57	0.000299	0.000709	RBBP5	-25
chr1	209767736	209770608	19269	11626	-1.66	0.00016	0.000501	TRAF3IP3	10674	IRF6	36872
chr1	212034575	212036473	18096	10899	-1.66	0.000145	0.000473	DTL	-53	INTS7	18
chr1	219173643	219174734	10984	7109	-1.55	0.00124	0.0017	LYPLAL1	345
chr1	222589135	222590636	13972	8375	-1.67	0.000722	0.00117	TAF1A	47
chr1	222711088	222714160	35253	22088	-1.6	1.29e-05	0.000372	AIDA	-100	BROX	71
chr1	224329429	224330963	14735	9186	-1.6	0.000119	0.000443	NVL	191
chr1	225777182	225779046	13443	7882	-1.71	0.00036	0.000784	SRP9	285
chr1	225998219	226000372	17895	11191	-1.6	0.000528	0.000968	SDE2	35
chr1	231527987	231529599	15596	9652	-1.62	0.000402	0.00083	TSNAX	140	TSNAX-DISC1	140
chr1	235127207	235129292	14443	9277	-1.56	0.000263	0.000659	TOMM20	686
chr1	235160485	235161908	13842	8843	-1.57	0.000264	0.000659	RBM34	260
chr2	8680963	8683738	19706	12718	-1.55	8.95e-05	0.000402	ID2	3506	KIDINS220	155274
chr2	20049560	20052585	31627	20013	-1.58	3.89e-05	0.000372	LAPTM4A	955
chr2	26243154	26245951	31282	20462	-1.53	3.63e-05	0.000372	HADHB	-342	HADHA	173
chr2	26344997	26347291	24727	16254	-1.52	4.38e-05	0.000372	SELENOI	30
chr2	27771081	27772550	17256	11388	-1.52	6.11e-05	0.000372	MRPL33	99
chr2	32062563	32064771	20802	13822	-1.51	7.2e-05	0.000372	SPAST	56
chr2	32165480	32166708	10605	6453	-1.64	0.00161	0.00213	SLC30A6	230
chr2	33475611	33478329	13621	8271	-1.65	0.00113	0.00158	RASGRP3	742
chr2	45610348	45611680	10358	6593	-1.57	0.0027	0.00325	SRBD1	267
chr2	53767337	53768610	13549	8235	-1.65	0.000467	0.000891	CHAC2	182
chr2	54557607	54561105	38653	25092	-1.54	7.32e-05	0.000372	EML6	-165186	SPTBN1	103071
chr2	55231624	55233598	21733	12824	-1.69	6.5e-05	0.000372	CLHC1	-298	RPS27A	209
chr2	55616104	55619514	35729	22414	-1.59	6.59e-06	0.000372	PPP4R3B	-221
chr2	61016464	61018612	28586	17263	-1.66	2.43e-05	0.000372	PEX13	-184	PUS10	716
chr2	61887223	61888936	19630	12801	-1.53	1.19e-05	0.000372	CCT4	724
chr2	61905284	61906312	11247	7284	-1.54	0.00266	0.00321	COMMD1	151
chr2	68062250	68063398	10801	5360	-2.01	0.000348	0.000772	C1D	159
chr2	68364922	68367166	13534	7175	-1.89	0.00263	0.00318	PLEK	871
chr2	68734739	68737333	13661	6865	-1.99	0.000149	0.00048	ARHGAP25	1201	BMP10	135481
chr2	69893579	69894666	10551	5556	-1.9	0.000312	0.000726	SNRNP27	563
chr2	70247029	70249061	19787	11277	-1.75	4.11e-05	0.000372	TIA1	596
chr2	70292734	70294461	9965	6005	-1.66	0.0011	0.00156	SNRPG	113
chr2	71129617	71131364	19421	12761	-1.52	0.000124	0.000444	MCEE	-254	MPHOSPH10	177
chr2	74177778	74179203	15017	9742	-1.54	0.000343	0.000767	MOB1A	377
chr2	86105204	86107049	18084	11357	-1.59	8.45e-05	0.000393	PTCD3	-55	POLR1A	28
chr2	99180365	99181939	14620	8485	-1.72	0.000202	0.000565	MITD1	-94	MRPL30	73
chr2	110677593	110679035	16097	10234	-1.57	0.000268	0.000662	BUB1	-200
chr2	113889229	113892078	29536	19408	-1.52	1.2e-05	0.000372	ACTR3	694
chr2	134917776	134920243	24960	16470	-1.52	7.33e-05	0.000372	CCNT2	185
chr2	135051817	135052983	9927	5606	-1.77	0.000596	0.00103	MAP3K19	-4955	RAB3GAP1	102
chr2	149586035	149588136	17683	11163	-1.58	0.000472	0.000894	MMADHC	516
chr2	151289254	151290500	13308	8783	-1.52	0.000396	0.00083	NMI	180
chr2	157438789	157444921	45630	23356	-1.95	4.91e-05	0.000372	ERMN	-114142	CYTIP	2287
chr2	159614727	159616728	22699	14991	-1.51	0.000162	0.000506	BAZ2B	964
chr2	161159978	161161740	17324	11327	-1.53	0.00025	0.000641	TANK	562
chr2	174595390	174597818	13358	6307	-2.12	0.000444	0.000863	GPR155	-109524	WIPF1	37975
chr2	174632770	174635329	18584	9779	-1.9	0.000422	0.000847	WIPF1	529
chr2	178477995	178479329	12003	7726	-1.55	0.00069	0.00113	PLEKHA3	-1806	FKBP7	-104
chr2	183078258	183079411	11625	6909	-1.68	0.000613	0.00106	DUSP19	76
chr2	183123771	183125450	18138	11941	-1.52	0.000498	0.00093	NUP35	256
chr2	189440568	189442378	17917	11325	-1.58	7.06e-05	0.000372	WDR75	40
chr2	189762225	189763519	10032	5909	-1.7	0.00044	0.000861	OSGEPL1	-105
chr2	191676951	191679337	18889	12125	-1.56	0.000459	0.00088	NABP1	-388
chr2	196166957	196169087	14131	5527	-2.56	0.000245	0.000634	DNAH7	-99210	STK17B	3553
chr2	197433448	197436180	26719	15090	-1.77	1.28e-05	0.000372	SF3B1	277
chr2	197452694	197454616	20206	12807	-1.58	2.36e-05	0.000372	COQ10B	232
chr2	200888746	200890087	14414	8980	-1.61	0.000438	0.000861	PPIL3	-148	NIF3L1	32
chr2	201070718	201072579	20266	12190	-1.66	0.000124	0.000444	NDUFB3	-90	FAM126B	20
chr2	201118019	201119847	20895	12752	-1.64	0.000368	0.000798	CASP10	-63948	CFLAR	2829
chr2	202911178	202912361	10754	5494	-1.96	0.000299	0.000709	CARF	-444	WDR12	456
chr2	208265347	208267423	19790	12296	-1.61	0.000125	0.000444	PIKFYVE	118
chr2	213148576	213152955	25382	16677	-1.52	2e-05	0.000372	IKZF2	837
chr2	216109023	216110439	11367	6991	-1.63	0.000947	0.0014	XRCC5	2267	MARCH4	262296
chr2	216497939	216499882	17011	11220	-1.52	0.000104	0.000419	RPL37A	722
chr2	230219262	230220621	10052	5808	-1.73	0.00162	0.00213	SP110	8
chr2	230415893	230418139	12917	6695	-1.93	0.000392	0.000827	SP100	750
chr2	232927147	232928751	6633	10604	1.6	0.00852	0.00911	C2orf82	58317	NGEF	85323
chr2	236536855	236538986	8897	5745	-1.55	0.00433	0.00496	IQCA1	-34224	ACKR3	-31720
chr3	8962747	8963963	13226	8773	-1.51	0.00182	0.00233	RAD18	147
chr3	11272044	11273542	14385	9497	-1.51	0.000648	0.00109	ATG7	377
chr3	11641345	11644213	23506	14055	-1.67	1.48e-05	0.000372	VGLL4	1145	ATG7	370363
chr3	16286315	16290228	17486	10936	-1.6	0.000641	0.00109	OXNAD1	23073	RFTN1	225434
chr3	20185432	20187011	14912	9656	-1.54	0.00127	0.00173	SGO1	-31
chr3	25789524	25790705	11323	7189	-1.57	0.00136	0.00184	OXSM	35
chr3	45688245	45690459	20772	13483	-1.54	9.42e-05	0.000409	SACM1L	90
chr3	48716072	48717659	16469	10378	-1.59	0.00108	0.00154	IP6K2	384
chr3	56556639	56558240	14727	9305	-1.58	0.000219	0.000592	ERC2	-89077	FAM208A	125577
chr3	57595985	57598513	23372	13979	-1.67	0.000125	0.000444	ARF4	159
chr3	69084325	69086679	24719	14701	-1.68	1.47e-05	0.000372	ARL6IP5	558
chr3	71128467	71131204	11533	6523	-1.77	0.00141	0.0019	FOXP1	454153
chr3	71304023	71306187	10931	5623	-1.94	0.000669	0.00111	FOXP1	278884
chr3	88149004	88151188	24712	15212	-1.62	5.44e-06	0.000372	C3orf38	353
chr3	94062122	94063596	12974	7091	-1.83	9.75e-05	0.000409	NSUN3	-57	DHFR2	364
chr3	101685398	101687016	15352	9143	-1.68	0.000185	0.000548	RPL24	575
chr3	101724286	101725828	16904	10183	-1.66	6.69e-05	0.000372	NXPE3	-54385	CEP97	1132
chr3	112990579	112991936	13072	8553	-1.53	0.000591	0.00103	GTPBP8	340
chr3	119676536	119677994	10539	6877	-1.53	0.00229	0.00285	COX17	138
chr3	120741666	120743610	19543	12745	-1.53	6.33e-05	0.000372	RABL3	-101	GTF2E1	-94
chr3	121659346	121660974	9918	5867	-1.69	0.00636	0.00704	HCLS1	751
chr3	121834196	121836719	19077	12444	-1.53	0.000533	0.000969	IQCB1	-379	EAF2	243
chr3	122415336	122417013	16043	8858	-1.81	6.55e-05	0.000372	WDR5B	-124
chr3	129159917	129162356	22432	13952	-1.61	7.32e-05	0.000372	ISY1	-89
chr3	142446517	142448563	24490	16040	-1.53	6.88e-05	0.000372	XRN1	522
chr3	143000635	143002981	23600	15600	-1.51	7.01e-05	0.000372	U2SURP	269
chr3	152267853	152271874	39691	23057	-1.72	2.07e-05	0.000372	P2RY1	-564829	MBNL1	1824
chr3	154323452	154324971	15887	9118	-1.74	9.92e-05	0.000409	DHX36	285
chr3	157174452	157176292	13344	7750	-1.72	0.00035	0.000773	PTX3	-261417	CCNL1	-15159
chr3	170869166	170870644	14504	8303	-1.75	5.39e-05	0.000372	RPL22L1	578
chr3	180601531	180603058	15978	10494	-1.52	6.55e-05	0.000372	TTC14	165
chr3	180911939	180913907	20011	12882	-1.55	4.65e-05	0.000372	FXR1	621
chr3	185934307	185938423	37610	22562	-1.67	4.51e-05	0.000372	IGF2BP2	-111353	TRA2B	1771
chr3	186782580	186785809	37258	24455	-1.52	3.08e-05	0.000372	EIF4A2	648
chr3	187742381	187746296	35538	20469	-1.74	0.000396	0.00083	RTP2	-41782	BCL6	1388
chr3	194671415	194673105	15323	8450	-1.81	0.000632	0.00107	LSG1	217
chr3	196502563	196504045	20803	13752	-1.51	0.00151	0.00202	RNF168	464
chr3	197949684	197951134	15110	7893	-1.91	0.000538	0.000973	RPL35A	422
chr4	6707936	6710599	17075	10795	-1.58	0.00274	0.00329	MRFAP1L1	612
chr4	17614043	17615499	17229	10355	-1.66	0.000184	0.000548	MED28	140
chr4	25159790	25161779	17514	11111	-1.58	2.26e-05	0.000372	SEPSECS	-343	ENSG00000281028	122
chr4	39182035	39183269	11434	7542	-1.52	0.00334	0.00395	WDR19	248
chr4	39457763	39459733	21882	14388	-1.52	6.01e-05	0.000372	RPL9	140	LIAS	161
chr4	40196259	40201287	35494	20052	-1.77	5.25e-05	0.000372	CHRNA9	-136556	RHOH	1866
chr4	44677761	44679437	20359	12613	-1.61	3.82e-05	0.000372	GUF1	170
chr4	56386825	56388364	16280	9673	-1.68	0.000157	0.000495	AASDH	-95
chr4	56466562	56468866	24647	15517	-1.59	3.58e-05	0.000372	SRP72	799
chr4	56978489	56979678	12255	7563	-1.62	0.000548	0.000982	NOA1	-261
chr4	67544646	67546105	12452	7800	-1.6	0.000582	0.00102	CENPC	230
chr4	75513001	75515326	22671	14774	-1.53	7.68e-05	0.000382	THAP6	-309	RCHY1	521
chr4	75989793	75991243	15784	9705	-1.63	0.000384	0.000816	SDAD1	442
chr4	77861960	77863427	11649	6062	-1.92	0.000197	0.000565	MRPL1	174
chr4	83034595	83036074	11073	7139	-1.55	0.000773	0.00122	COPS4	110
chr4	83112270	83114869	17842	9045	-1.97	6.49e-05	0.000372	PLAC8	1145	COPS4	78345
chr4	83454818	83456736	20694	11922	-1.74	7.19e-05	0.000372	MRPS18C	-188	HELQ	79
chr4	87005712	87008394	31321	19280	-1.62	1.55e-05	0.000372	AFF1	72051	KLHL8	213555
chr4	94207192	94208578	13063	8422	-1.55	0.000454	0.000872	SMARCAD1	274
chr4	99563148	99564224	10646	6972	-1.53	0.0018	0.00231	MTTP	-397	TRMT10A	-18
chr4	99893574	99894959	9760	6419	-1.52	0.00336	0.00397	LAMTOR3	223
chr4	102824542	102828868	48397	30908	-1.57	5.79e-05	0.000372	MANBA	-65711	UBE2D3	42191
chr4	108620034	108621715	15819	9879	-1.6	0.000204	0.000568	RPL34	219
chr4	108649944	108651569	11373	6383	-1.78	0.000526	0.000965	OSTC	110
chr4	112636492	112638032	13352	7521	-1.78	7.19e-05	0.000372	ZGRF1	-352	LARP7	136
chr4	118278350	118280228	14499	9254	-1.57	0.000202	0.000565	PRSS12	73714	NDST3	244944
chr4	118685061	118686207	11076	7093	-1.56	0.000842	0.00129	METTL14	266
chr4	119299319	119301083	17344	11348	-1.53	0.000566	0.00101	C4orf3	4244	USP53	60985
chr4	120066174	120067696	13049	8393	-1.55	0.000276	0.000674	MAD2L1	139
chr4	121800796	121801997	12466	7756	-1.61	0.000247	0.000634	EXOSC9	77
chr4	122732328	122733496	8095	5314	-1.52	0.00805	0.00864	BBS12	210
chr4	129092014	129094193	17169	11066	-1.55	0.000144	0.000473	C4orf33	-213	SCLT1	503
chr4	145178281	145179878	10414	6475	-1.61	0.00132	0.00179	OTUD4	600
chr4	152678390	152680351	10080	5543	-1.82	0.00315	0.00375	TMEM154	794
chr4	154549508	154550851	13973	8803	-1.59	0.000323	0.000735	PLRG1	255
chr4	169619646	169621710	20625	13046	-1.58	0.000256	0.000648	CLCN3	152
chr4	174282869	174284604	23344	14527	-1.61	6.19e-05	0.000372	CEP44	-167	FBXO8	527
chr4	177441174	177443211	16284	10563	-1.54	8.99e-05	0.000402	AGA	310
chr4	184536733	184538300	11671	6796	-1.72	0.000618	0.00106	IRF2	-62937	CASP3	111958
chr5	34007145	34008890	16612	10784	-1.54	5.05e-05	0.000372	AMACR	10
chr5	35857030	35860343	14513	7301	-1.99	0.000245	0.000634	IL7R	1838	CAPSL	80092
chr5	37370441	37371698	14007	8942	-1.57	0.000142	0.000471	NUP155	111
chr5	39199375	39203121	21425	11006	-1.95	9.4e-05	0.000409	RICTOR	-126849	FYB1	69409
chr5	42993712	42995590	9216	5356	-1.72	0.000644	0.00109	SELENOP	-182572	ANXA2R	48519
chr5	43007203	43010540	14672	8672	-1.69	0.000811	0.00126	SELENOP	-196793	ANXA2R	34298
chr5	43018915	43020668	10544	5739	-1.84	0.00061	0.00105	SELENOP	-207713	ANXA2R	23378
chr5	43064605	43068689	35418	23097	-1.53	8.61e-05	0.000394	ZNF131	-54861	ANXA2R	-23477
chr5	55306743	55308883	20671	13033	-1.59	3.48e-05	0.000372	DHX29	-91	SKIV2L2	53
chr5	64767531	64769857	21822	13983	-1.56	0.000245	0.000634	CWC27	-236	SREK1IP1	-9
chr5	65480267	65483477	17453	9662	-1.81	0.000211	0.000578	ADAMTS6	48
chr5	65562689	65564133	13939	8444	-1.65	0.000225	0.000601	CENPK	-240	PPWD1	172
chr5	65623462	65625673	20941	12807	-1.64	3.96e-05	0.000372	TRAPPC13	-466	TRIM23	78
chr5	66143562	66145500	25979	16294	-1.59	1.33e-05	0.000372	SREK1	313
chr5	78293866	78295276	20105	13065	-1.54	0.000137	0.000465	AP3B1	184
chr5	82277381	82278941	16803	10320	-1.63	1.18e-05	0.000372	ATP6AP1L	-1301	RPS23	416
chr5	83076366	83078335	18463	11334	-1.63	5.92e-05	0.000372	XRCC4	-242	TMEM167A	145
chr5	88880995	88884750	24790	14182	-1.75	0.000117	0.000443	TMEM161B	-614043	MEF2C	21180
chr5	90408959	90410807	16368	10240	-1.6	0.000125	0.000444	CETN3	-126
chr5	91379405	91384479	53961	26551	-2.03	1.83e-05	0.000372	ARRDC3	1417	ADGRV1	823145
chr5	95554313	95556058	17229	10547	-1.63	3.85e-05	0.000372	TTC37	-179	ARSK	112
chr5	95821171	95824544	24938	13893	-1.79	7.19e-05	0.000372	GLRX	-144
chr5	97182350	97184071	14940	8290	-1.8	0.000547	0.000982	RIOK2	49
chr5	100900062	100905035	47038	31110	-1.51	8.17e-05	0.000386	ST8SIA4	717
chr5	103119180	103121282	21457	12752	-1.68	1.42e-05	0.000372	GIN1	-80
chr5	109408428	109411181	24232	15709	-1.54	4.02e-05	0.000372	PJA2	189
chr5	111092105	111093613	15098	10050	-1.5	0.000186	0.000549	CAMK4	-131227	WDR36	1143
chr5	112860820	112862050	13910	8575	-1.62	0.000416	0.000845	ENSG00000272869	140	SRP19	213
chr5	112976055	112977920	22746	14502	-1.57	9.89e-06	0.000372	DCP2	252
chr5	119355282	119357658	11554	6932	-1.67	0.00447	0.0051	HSD17B4	-96100	TNFAIP8	23295
chr5	124746606	124749376	11559	6752	-1.71	0.00703	0.00767	ZNF608	-2566
chr5	131170149	131171793	11906	7225	-1.65	0.00099	0.00145	LYRM7	161
chr5	131633859	131636525	22887	14647	-1.56	0.000246	0.000634	RAPGEF6	-81
chr5	133025619	133027070	13008	8591	-1.51	0.001	0.00146	ZCCHC10	200
chr5	138177756	138179748	17442	10624	-1.64	0.000709	0.00115	KIF20A	-246	BRD8	234
chr5	138212660	138213970	11969	7537	-1.59	0.000908	0.00135	CDC23	28
chr5	140302521	140303630	10817	6470	-1.67	0.000992	0.00145	PFDN1	45
chr5	148383206	148384862	14467	8993	-1.61	0.00102	0.00148	FBXO38	32
chr5	149548982	149552115	30873	19585	-1.58	1.84e-05	0.000372	CSNK1A1	415
chr5	150758029	150759598	13125	8162	-1.61	0.000492	0.000923	DCTN4	221
chr5	154857148	154860298	34279	22685	-1.51	3.75e-05	0.000372	CNOT8	471
chr5	154940761	154941826	9761	5806	-1.68	0.000629	0.00107	GEMIN5	-3085	MRPL22	224
chr5	157141941	157143423	14132	8812	-1.6	0.000336	0.000755	MED7	502
chr5	157180896	157183252	10963	5713	-1.92	0.000578	0.00102	CYFIP2	-84005	ITK	1248
chr5	160008978	160010012	9355	5652	-1.66	0.000835	0.00128	TTC1	382
chr5	160417881	160419683	14284	8191	-1.74	0.000357	0.000781	PTTG1	-3128	SLU7	612
chr5	163459113	163461554	24771	16094	-1.54	7.77e-05	0.000384	HMMR	-216	NUDCD2	-194
chr5	163503144	163507034	29351	17114	-1.72	5.06e-05	0.000372	MAT2B	-459
chr5	170294274	170298291	37498	24034	-1.56	0.000352	0.000773	LCP2	1944	FOXI1	190386
chr5	173887477	173891744	23945	14201	-1.69	0.000854	0.0013	HGNC:24955	-155993	CPEB4	1331
chr5	181052583	181053936	7945	12348	1.55	0.00672	0.00737	BTNL9	13035	OR2V1	77317
chr6	13327632	13329288	13963	9239	-1.51	0.000511	0.000948	TBC1D7	-1548
chr6	18386892	18388854	17971	10364	-1.73	0.000137	0.000465	RNF144B	523
chr6	20534122	20535259	10326	5737	-1.8	0.000531	0.000969	CDKAL1	234
chr6	24718161	24722132	33784	20406	-1.66	5.78e-05	0.000372	C6orf62	689
chr6	24931428	24935052	30651	14571	-2.1	8.16e-05	0.000386	ENSG00000282804	-123442	RIPOR2	2812
chr6	24935374	24937466	15077	7825	-1.93	0.000228	0.000607	RIPOR2	-368
chr6	25962147	25963951	13682	8131	-1.68	0.000513	0.00095	TRIM38	247
chr6	26026119	26027796	10510	6435	-1.63	0.00609	0.00675	HIST1H4B	294
chr6	26031799	26033989	11206	6312	-1.78	0.00342	0.00402	HIST1H3B	-834	HIST1H2AB	674
chr6	26054214	26057245	25942	15214	-1.71	0.000496	0.00093	HIST1H1C	698
chr6	26122793	26127644	38787	21827	-1.78	0.000285	0.000692	HIST1H2BC	-1309	HIST1H2AC	1074
chr6	26158483	26160148	11024	6099	-1.81	0.00243	0.00298	HIST1H2BE	-12743	HIST1H2BD	1170
chr6	26171410	26172969	10149	6375	-1.59	0.00094	0.00139	HIST1H2BE	131
chr6	26196277	26198367	12540	7239	-1.73	0.00525	0.00588	HIST1H2BF	-2198	HIST1H3D	-72
chr6	26204114	26206439	13936	7736	-1.8	0.000862	0.0013	HIST1H4E	725
chr6	26233603	26235437	15328	9483	-1.62	0.000758	0.00121	HIST1H1D	413
chr6	26270705	26273560	12573	8120	-1.55	0.00939	0.00999	HIST1H2BI	-843	HIST1H3G	-318
chr6	26284407	26286446	13430	8848	-1.52	0.00345	0.00405	HIST1H4H	107
chr6	26658756	26660302	10933	7280	-1.5	0.00325	0.00386	ZNF322	223
chr6	27145148	27146429	10534	6329	-1.66	0.00226	0.00282	HIST1H2AH	-1340	HIST1H2BK	1009
chr6	27478153	27480007	10823	6060	-1.79	0.00103	0.00148	ZNF184	-5962	HIST1H2BL	328851
chr6	27836372	27840023	20808	11679	-1.78	0.000425	0.00085	HIST1H2AK	141	HIST1H2BN	438
chr6	27871589	27874026	15918	9282	-1.71	0.00183	0.00234	HIST1H3I	-493	HIST1H4L	702
chr6	27894393	27895899	12709	7870	-1.61	0.00122	0.0017	HIST1H3J	-4354	HIST1H2AM	-1997	HIST1H2BO	1683
chr6	28136188	28138073	18957	12019	-1.58	0.000813	0.00126	ZKSCAN8	-4807
chr6	36545354	36547597	27578	17981	-1.53	1.29e-05	0.000372	STK38	994
chr6	36593557	36595944	20312	10464	-1.94	6.33e-05	0.000372	SRSF3	383
chr6	42879202	42880544	12818	8079	-1.59	0.000894	0.00134	RPL7L1	238
chr6	43628440	43630408	21722	14125	-1.54	0.000134	0.00046	GTPBP2	-262	MAD2L1BP	-116
chr6	49462298	49464029	18135	11617	-1.56	0.000224	0.000601	CENPQ	-214	MUT	27
chr6	57316643	57318249	14021	8591	-1.63	0.000511	0.000948	PRIM2	-178
chr6	75242961	75244467	13651	7566	-1.8	3.11e-05	0.000372	COL12A1	-37663	COX7A2	6609
chr6	80003689	80005204	15223	9675	-1.57	0.000131	0.000455	TTK	-158
chr6	84226896	84228233	14705	9615	-1.53	0.00085	0.0013	CEP162	70
chr6	85677261	85679549	19928	12565	-1.59	9.55e-05	0.000409	SYNCRIP	-35120
chr6	87698592	87703030	43184	28407	-1.52	2.71e-05	0.000372	AKIRIN2	1398	ORC3	110676
chr6	95576360	95578374	19165	12708	-1.51	5.4e-05	0.000372	MANEA	-176
chr6	99424487	99426590	23679	13160	-1.8	4.72e-05	0.000372	PNISR	-231
chr6	106629146	106630309	11096	7204	-1.54	0.0017	0.00223	RTN4IP1	-241	QRSL1	150
chr6	111605148	111606313	9984	6560	-1.52	0.00247	0.00302	TRAF3IP2	547
chr6	122470743	122472531	19282	11845	-1.63	3.54e-05	0.000372	PKIB	-280	SERINC1	185
chr6	132812682	132815787	23225	13174	-1.76	6.9e-05	0.000372	RPS12	-206
chr6	135053768	135055254	13054	7765	-1.68	0.0011	0.00156	HBS1L	387
chr6	136288027	136290985	30613	19583	-1.56	0.000139	0.000468	BCLAF1	345
chr6	138772937	138774607	15482	9727	-1.59	0.000554	0.00099	CCDC28A	263
chr6	143449754	143451574	16884	10761	-1.57	0.000761	0.00121	PEX3	-316	ADAT2	9
chr6	149544875	149546537	20294	13245	-1.53	2.68e-05	0.000372	PPIL4	332
chr6	152301184	152302596	9997	6295	-1.59	0.000811	0.00126	SYNE1	335509	ESR1	611394
chr6	155313726	155315404	17820	11750	-1.52	5.5e-05	0.000372	TFB1M	-81
chr6	159041310	159045103	26310	13737	-1.92	0.000576	0.00102	RSPH3	-43041	TAGAP	1945
chr6	161272830	161274630	11113	7309	-1.52	0.00517	0.0058	AGPAT4	331
chr7	6080760	6081849	8290	5442	-1.52	0.00402	0.00464	USP42	-23579	EIF2AK1	-22075
chr7	10939210	10941355	19466	12644	-1.54	0.00011	0.000437	NDUFA4	-27
chr7	13989252	13991845	17703	11704	-1.51	0.00249	0.00304	ETV1	-603
chr7	22821860	22823187	11362	7547	-1.51	0.00146	0.00195	TOMM7	327
chr7	23470385	23472174	12178	7741	-1.57	0.00106	0.00152	IGF2BP3	-813
chr7	33128862	33130178	12046	7930	-1.52	0.00536	0.00599	BBS9	-12
chr7	36722940	36724492	10501	6114	-1.72	0.00243	0.00298	AOAH	733
chr7	42931202	42933265	20918	13429	-1.56	0.000126	0.000444	PSMA2	-11	MRPL32	34
chr7	43728631	43730137	14973	9929	-1.51	0.000681	0.00112	COA1	-79088	BLVRA	-29303
chr7	44846761	44848728	16374	10909	-1.5	0.000672	0.00111	H2AFV	318
chr7	45026961	45030061	23012	14086	-1.63	0.000152	0.000482	CCM2	877
chr7	77196096	77200691	18916	10131	-1.87	0.00368	0.00429	FGL2	1432	CCDC146	75777
chr7	90345938	90347434	13267	8129	-1.63	0.000539	0.000973	GTPBP10	10
chr7	91879947	91881319	11295	7236	-1.56	0.00111	0.00156	MTERF1	87
chr7	93231575	93232963	13563	8416	-1.61	0.000299	0.000709	VPS50	-71
chr7	96709149	96710257	9990	6465	-1.55	0.00185	0.00235	SLC25A13	-387556	DLX6	-295845
chr7	97117213	97118579	11339	7463	-1.52	0.00146	0.00195	TAC1	-614012	SDHAF3	1306
chr7	103347450	103348544	9520	6221	-1.53	0.00434	0.00496	DNAJC2	-3124	PSMC2	3083
chr7	105012077	105016861	58350	38297	-1.52	1.84e-05	0.000372	KMT2E	290
chr7	107742885	107745128	26953	17820	-1.51	0.000112	0.000437	CBLL1	310
chr7	118183073	118185088	19740	11388	-1.73	4.19e-05	0.000372	LSM8	49
chr7	120949953	120951752	13651	8870	-1.54	0.000324	0.000735	ING3	104
chr7	123557059	123558543	14332	8602	-1.67	0.000192	0.000558	NDUFA5	-21
chr7	124929189	124930321	8154	5014	-1.63	0.00379	0.00439	POT1	226
chr7	129053875	129055781	22137	14532	-1.52	5.54e-05	0.000372	TNPO3	86
chr7	134645757	134647694	16117	8469	-1.9	0.000276	0.000674	BPGM	-105
chr7	135147336	135149118	12646	6770	-1.87	0.00239	0.00295	TMEM140	155
chr7	141014094	141015550	12299	8130	-1.51	0.000861	0.0013	MRPS33	161
chr7	144834798	144836374	15174	9817	-1.55	0.000256	0.000648	TPK1	467
chr7	148940554	148941785	9894	6257	-1.58	0.00175	0.00226	EZH2	-56892	PDIA4	87471
chr7	150513919	150520561	32832	19233	-1.71	8.24e-05	0.000387	GIMAP4	-50037	GIMAP7	2410
chr7	150567321	150570820	22465	14584	-1.54	0.00184	0.00234	GIMAP4	1794	GIMAP6	63577
chr7	150685328	150686644	10970	6263	-1.75	0.000698	0.00114	GIMAP2	286
chr7	150715981	150718936	19443	12870	-1.51	0.000938	0.00139	GIMAP1-GIMAP5	791	GIMAP1	902
chr7	151027932	151029026	10008	6540	-1.53	0.00259	0.00315	ATG9B	-3980	ABCB8	29
chr7	151114499	151115869	6608	13053	1.98	0.00353	0.00413	AGAP3	28442	GBX1	52364
chr8	26291196	26293550	17436	11524	-1.51	0.000582	0.00102	PPP2R2A	-843
chr8	28092583	28093715	11813	7267	-1.63	0.000435	0.000861	ELP3	311
chr8	30743503	30744806	13923	8661	-1.61	8.08e-05	0.000386	UBXN8	-10
chr8	38175531	38177921	32894	21063	-1.56	3.77e-05	0.000372	LSM1	-10	BAG4	127
chr8	56073403	56075032	12437	7872	-1.58	0.000272	0.00067	RPS20	291
chr8	65633356	65634709	11708	6819	-1.72	0.000524	0.000964	ARMC1	174
chr8	66663268	66668318	35880	22598	-1.59	0.000427	0.00085	C8orf44	-1825	VCPIP1	1424
chr8	67061225	67063011	18501	10871	-1.7	4.01e-05	0.000372	CSPP1	-2250	COPS5	199
chr8	85219824	85221165	12350	7557	-1.63	0.000266	0.00066	CA13	-25032	E2F5	43108
chr8	86507709	86509178	12989	8189	-1.59	0.000417	0.000845	RMDN1	336
chr8	91069271	91071266	16602	9507	-1.75	3.65e-05	0.000372	OTUD6B	73
chr8	93739899	93741336	14532	9505	-1.53	0.000434	0.000859	RBM12B	399
chr8	94552633	94554414	15715	9592	-1.64	0.00024	0.00063	VIRMA	-1
chr8	94822723	94824579	22324	14544	-1.53	4.65e-05	0.000372	INTS8	352
chr8	96234876	96235922	12014	7228	-1.66	0.000372	0.000799	UQCRB	140
chr8	98044215	98046594	20041	13279	-1.51	0.000233	0.000616	RPL30	109
chr8	99012322	99014058	20201	13269	-1.52	2.9e-05	0.000372	VPS13B	-76
chr8	100149934	100151324	13809	6655	-2.07	0.000241	0.000631	POLR2K	45
chr8	108247596	108249313	15038	8666	-1.74	0.000148	0.00048	EIF3E	310
chr8	108442761	108444538	16629	10967	-1.52	0.000138	0.000465	EMC2	26
chr8	116755022	116756322	15722	10358	-1.52	0.000298	0.000709	EIF3H	149
chr8	119832227	119833305	11314	7110	-1.59	0.000534	0.000969	TAF2	97
chr8	120444323	120445916	19383	11765	-1.65	1.95e-05	0.000372	MTBP	-306	MRPL13	266
chr8	125949792	125951349	8884	5746	-1.55	0.00901	0.00961	TRIB1	520250	FAM84B	607822
chr8	133071050	133075604	32823	18354	-1.79	0.000418	0.000845	WISP1	-117712	SLA	-12969
chr9	5449819	5451036	9282	5691	-1.63	0.00209	0.00262	CD274	-97
chr9	6014762	6015907	9286	5330	-1.74	0.00109	0.00155	RANBP6	283
chr9	19101988	19103345	8321	5370	-1.55	0.00526	0.00589	HAUS6	452
chr9	32525362	32526863	14130	9064	-1.56	0.000263	0.000659	DDX58	211
chr9	32572372	32573583	12579	7917	-1.59	0.000426	0.00085	NDUFB6	184
chr9	92292967	92294264	11637	7106	-1.64	0.000579	0.00102	IARS	84
chr9	101397731	101399791	16628	10526	-1.58	0.000175	0.000529	ZNF189	-267	MRPL50	-147
chr9	101533160	101534647	13182	8787	-1.5	0.000421	0.000847	TMEM246	-456	RNF20	53
chr9	104093201	104095102	18651	11205	-1.66	0.00011	0.000437	SMC2	-108
chr9	122912511	122914084	11864	6949	-1.71	0.00105	0.00151	ZBTB6	32
chr9	124658394	124660839	11307	6216	-1.82	0.000473	0.000894	NR5A1	-152187	NR6A1	111660
chr9	130171875	130173445	6737	10930	1.62	0.00358	0.00418	NCS1	82
chr9	135478981	135481022	14620	21998	1.5	0.0018	0.00231	PPP1R26	200
chr9	136665240	136666583	6248	11255	1.8	0.00517	0.0058	EGFL7	7056	AGPAT2	21511
chr10	11163562	11172253	65017	42995	-1.51	0.000723	0.00117	CELF2	149978	USP6NL	364367
chr10	12195158	12197051	21339	13740	-1.55	7.28e-05	0.000372	NUDT5	19	CDC123	139
chr10	14959119	14960410	16539	10304	-1.61	0.000191	0.000558	MEIG1	326
chr10	17643143	17645905	22273	13913	-1.6	3.32e-05	0.000372	STAM	399
chr10	18650681	18652139	10565	5772	-1.83	0.000826	0.00127	NSUN6	212
chr10	26437679	26440410	25564	15904	-1.61	5.79e-05	0.000372	APBB1IP	842
chr10	32376884	32379867	16728	7467	-2.24	8.06e-05	0.000386	EPC1	-31191	ITGB1	579518
chr10	32445445	32447467	15394	9692	-1.59	0.000403	0.00083	EPC1	-99271	ITGB1	511438
chr10	43076449	43077836	9057	14293	1.58	0.00222	0.00278	RET	116
chr10	51698506	51700375	16777	10615	-1.58	0.000317	0.000732	CSTF2T	150
chr10	61899829	61904355	39897	24002	-1.66	5.18e-05	0.000372	ARID5B	792
chr10	63132935	63134657	13985	9265	-1.51	0.00173	0.00225	NRBF2	506
chr10	63265112	63269470	30367	11909	-2.55	4.09e-05	0.000372	NRBF2	134001	JMJD1C	198590
chr10	67763394	67765055	13063	8513	-1.53	0.00139	0.00188	CTNNA3	-68056	DNAJC12	73939
chr10	68331152	68334095	37530	24863	-1.51	1.33e-05	0.000372	PBLD	303	HNRNPH3	549
chr10	69087568	69089596	14080	6996	-2.01	0.00116	0.00161	SRGN	464
chr10	72215558	72217128	13671	8779	-1.56	0.000631	0.00107	ASCC1	-68	ANAPC16	343
chr10	72625150	72626594	14939	9901	-1.51	0.000985	0.00145	MICU1	233
chr10	73743648	73745374	18398	12064	-1.53	0.000672	0.00111	SEC24C	120
chr10	90871266	90872968	15553	10253	-1.52	0.000128	0.000448	RPP30	165
chr10	96129425	96131212	20979	13588	-1.54	0.000307	0.000719	ZNF518A	263
chr10	98134282	98135844	15077	9968	-1.51	0.00103	0.00148	CRTAC1	-104235	R3HCC1L	-28224
chr10	104120840	104122819	15571	10250	-1.52	0.000983	0.00145	SFR1	-335
chr10	104268106	104269757	15560	9672	-1.61	0.000417	0.000845	GSTO2	-249
chr10	114524861	114527275	10643	6354	-1.67	0.0018	0.00231	AFAP1L2	-121583	ABLIM1	132230
chr10	128047010	128050195	22518	14720	-1.53	0.00484	0.00545	MKI67	77782	PTPRE	141542
chr10	129962894	129965295	9512	14849	1.56	0.00699	0.00764	EBF3	-254
chr11	6744546	6746908	9752	5488	-1.78	0.00229	0.00285	MRPL17	-62326	OR2AG2	26249
chr11	8688124	8689663	13359	8818	-1.52	0.000593	0.00103	RPL27A	6483	ST5	222057
chr11	9459612	9462140	26002	16240	-1.6	2.85e-05	0.000372	ZNF143	-89
chr11	14499077	14500832	16602	10217	-1.62	9.28e-05	0.000409	COPB1	-103
chr11	14519196	14521080	18744	12300	-1.52	0.00043	0.000855	ENSG00000256206	206
chr11	16737964	16739953	18419	11695	-1.57	0.000103	0.000416	C11orf58	558
chr11	31508802	31510557	16709	10543	-1.58	0.000397	0.00083	ELP4	-98	IMMP1L	-58
chr11	33160127	33162047	15420	8982	-1.72	0.000167	0.000509	CSTF3	378
chr11	34438234	34440465	21949	14176	-1.55	0.000116	0.000443	CAT	425
chr11	45664561	45666016	7855	12191	1.55	0.00259	0.00315	CHST1	333
chr11	46616841	46618466	19575	12778	-1.53	6.26e-05	0.000372	HARBI1	-427	ATG13	54
chr11	57657065	57658378	8917	5328	-1.67	0.00237	0.00293	CLP1	564
chr11	62590869	62592536	13635	8642	-1.58	0.00158	0.0021	ENSG00000255508	-172	TUT1	-66
chr11	65496800	65505965	86720	44016	-1.97	8.7e-05	0.000394	SCYL1	-23694	FRMD8	114784
chr11	67239572	67241728	14918	9899	-1.51	0.00173	0.00225	GRK2	-25760	KDM2A	120963
chr11	72079875	72081079	9986	6164	-1.62	0.00285	0.00342	LRTOMT	146	NUMA1	210
chr11	72111618	72113301	10575	6902	-1.53	0.00423	0.00487	ANAPC15	-1017
chr11	73787623	73788483	8383	5588	-1.5	0.00559	0.00623	MRPL48	737
chr11	77993886	77995442	10927	6352	-1.72	0.00174	0.00225	INTS4	14
chr11	78138760	78140273	13306	8723	-1.53	0.00123	0.0017	ALG8	143
chr11	83156043	83160218	43703	25581	-1.71	2.58e-05	0.000372	PCF11	1143	CCDC90B	128276
chr11	85627242	85629375	19340	12263	-1.58	4.99e-05	0.000372	DLG2	-1039	TMEM126B	-276
chr11	85647456	85648686	10238	5483	-1.87	0.000386	0.000818	TMEM126A	83
chr11	86065584	86069822	43239	27312	-1.58	3.92e-05	0.000372	SYTL2	-256574	PICALM	1226
chr11	86301999	86303005	12260	7738	-1.58	0.000298	0.000709	HIKESHI	279
chr11	88336548	88338542	16529	10629	-1.56	6.91e-05	0.000372	CTSC	242
chr11	93740456	93742256	21859	13257	-1.65	5.26e-05	0.000372	ENSG00000284057	-308	C11orf54	-286	TAF1D	589
chr11	94972655	94974288	19538	12732	-1.53	0.000144	0.000473	KDM4D	-209	CWC15	140
chr11	108221386	108225429	35418	21570	-1.64	5.53e-05	0.000372	NPAT	-766	ATM	576
chr11	118223738	118225501	9920	5206	-1.91	0.00164	0.00216	JAML	474
chr11	118251570	118252850	13177	8569	-1.54	0.000742	0.00119	MPZL3	140
chr11	118359205	118360427	12938	8145	-1.59	0.000678	0.00112	UBE4A	172
chr11	118400676	118402590	19046	11907	-1.6	0.000118	0.000443	ATP5L	479
chr11	128515376	128523264	58707	36772	-1.6	2.27e-05	0.000372	ETS1	68238
chr12	387597	390079	25296	15309	-1.65	3.2e-05	0.000372	KDM5A	616
chr12	401210	402297	8552	5517	-1.55	0.00401	0.00463	CCDC77	178
chr12	3872306	3873692	9482	6267	-1.51	0.00651	0.00718	PARP11	375
chr12	4538065	4539452	14051	7782	-1.81	6.52e-05	0.000372	C12orf4	-288	RAD51AP1	-131
chr12	4648207	4649966	18062	10448	-1.73	0.000118	0.000443	AKAP3	-40	NDUFA9	-20
chr12	6492569	6494834	20542	12437	-1.65	6.78e-05	0.000372	MRPL51	-104	NCAPD2	323
chr12	8081447	8083188	15606	9765	-1.6	0.000207	0.000574	CLEC4A	-41314	NECAP1	5379
chr12	9647664	9650529	22554	12855	-1.75	0.00012	0.000443	KLRB1	-41211	CLEC2D	-20616
chr12	9758049	9761413	19195	8951	-2.14	0.000177	0.000531	CLECL1	-26432	CD69	1170
chr12	9868246	9870489	14540	5763	-2.52	0.000151	0.000482	CLEC2B	768
chr12	10212281	10214335	18914	12559	-1.51	0.000318	0.000732	GABARAPL1	503
chr12	10612759	10614287	12713	7363	-1.73	0.000222	0.000596	MAGOHB	100
chr12	14364975	14367788	16103	7694	-2.09	0.000447	0.000863	GRIN2B	-386019	ATF7IP	-18682
chr12	14802624	14804451	18683	11360	-1.64	0.00014	0.000469	WBP11	2
chr12	14960754	14962645	12032	6158	-1.95	0.000533	0.000969	ARHGDIB	-31
chr12	25051326	25053876	12447	5848	-2.13	0.000199	0.000565	LRMP	89
chr12	26937148	26940197	32162	21112	-1.52	1.22e-05	0.000372	INTS13	-352	FGFR1OP2	290
chr12	27523352	27524691	14376	9254	-1.55	0.000814	0.00126	PPFIBP1	-184
chr12	29380225	29381880	19126	12154	-1.57	0.000179	0.000536	ERGIC2	100
chr12	31728200	31730148	16172	10423	-1.55	0.000446	0.000863	H3F3C	63067	ETFBKMT	69486
chr12	31958525	31961899	29988	17703	-1.69	2.19e-05	0.000372	H3F3C	-167971	BICD1	-147017
chr12	40223624	40226234	18495	11516	-1.61	0.00123	0.0017	LRRK2	-145
chr12	42325544	42327382	15649	10301	-1.52	0.00015	0.00048	ZCRB1	-358	PPHLN1	297
chr12	43758000	43759616	14183	9125	-1.55	6.13e-05	0.000372	IRAK4	-147	PUS7L	9
chr12	45725437	45731602	57038	37292	-1.53	1.3e-06	0.000372	ARID2	-1145
chr12	48715852	48717197	13798	8950	-1.54	0.000402	0.00083	CCNT1	373
chr12	48851479	48853289	16951	11121	-1.52	0.00204	0.00257	DDX23	-221
chr12	53441054	53442283	10579	5681	-1.86	0.001	0.00146	PRR13	64
chr12	53624997	53626835	15036	9568	-1.57	0.00124	0.0017	ENSG00000267281	63	ATF7	491
chr12	53726456	53728110	13250	8216	-1.61	0.00169	0.00222	CALCOCO1	157
chr12	54279087	54282007	25293	16293	-1.55	6.75e-05	0.000372	CBX5	-445	HNRNPA1	-208
chr12	54299067	54301591	17969	9505	-1.89	0.00461	0.00523	NFE2	-4571
chr12	54982931	54985147	9712	6241	-1.56	0.00859	0.00918	TESPA1	633
chr12	55816861	55818822	20861	12536	-1.66	2.62e-05	0.000372	SARNP	-86	ORMDL2	-77
chr12	56041511	56043204	14040	8659	-1.62	0.00081	0.00126	RPS26	505
chr12	56116184	56117523	12924	7548	-1.71	0.000203	0.000566	ZC3H10	-1305	RPL41	268
chr12	56157389	56161093	28539	18834	-1.52	0.000307	0.000719	MYL6	1080	SMARCC2	30235
chr12	56333092	56334803	13377	8100	-1.65	0.000802	0.00126	IL23A	-4927	PAN2	-199
chr12	56359496	56360617	9172	4954	-1.85	0.000611	0.00106	STAT2	17
chr12	56448741	56449829	12438	7517	-1.65	0.000165	0.000508	TIMELESS	114
chr12	56468194	56469463	11871	7772	-1.53	0.00367	0.00428	SPRYD4	262
chr12	56723754	56725868	22094	14609	-1.51	0.0002	0.000565	NACA	488
chr12	56751619	56752605	8387	5559	-1.51	0.00425	0.00488	HSD17B6	-337	PRIM1	223
chr12	62259024	62261971	31236	18614	-1.68	1.71e-05	0.000372	USP15	141
chr12	68686476	68687711	15759	9435	-1.67	0.000107	0.000428	NUP107	360
chr12	71839380	71840825	14392	9093	-1.58	0.000218	0.00059	TBC1D15	385
chr12	74537333	74539978	18429	11990	-1.54	0.000476	0.000898	ATXN7L3B	829
chr12	75480451	75482543	11843	5775	-2.05	0.000722	0.00117	GLIPR1	817
chr12	75510572	75511976	12395	7506	-1.65	0.0013	0.00177	KRR1	347
chr12	82357480	82359452	16821	10937	-1.54	0.000199	0.000565	METTL25	-31	CCDC59	322
chr12	92136974	92147206	92789	57134	-1.62	3.09e-05	0.000372	DCN	-958967	BTG1	3807
chr12	93378353	93380894	19206	11529	-1.67	0.000256	0.000648	NUDT4	1741	UBE2N	62638
chr12	93467391	93468295	8063	5200	-1.55	0.00434	0.00496	MRPL42	355
chr12	93676756	93678254	12337	7768	-1.59	0.00126	0.00173	CRADD	-212
chr12	93741876	93743109	10155	6673	-1.52	0.00718	0.00782	PLXNC1	-406230	CRADD	64776
chr12	95002876	95003962	9995	6277	-1.59	0.00101	0.00146	NDUFA12	351
chr12	98503021	98504649	9959	6245	-1.59	0.00396	0.00459	TMPO	-11795
chr12	103965044	103966660	15488	9256	-1.67	0.000298	0.000709	TDG	48
chr12	104286835	104287968	9498	6071	-1.56	0.00334	0.00395	EID3	-16337	TXNRD1	71623
chr12	120528777	120530094	10945	6485	-1.69	0.00042	0.000847	COQ5	-254
chr12	122526093	122527907	16409	10244	-1.6	0.000467	0.000891	KNTC1	-248	RSRC2	-1
chr13	21139717	21141584	18024	10762	-1.67	3.67e-05	0.000372	SAP18	137
chr13	27250622	27253044	26450	16296	-1.62	5.94e-05	0.000372	RPL21	524
chr13	30615766	30619120	31587	19229	-1.64	6.84e-05	0.000372	USPL1	-340
chr13	30735316	30738171	12638	6439	-1.96	0.0074	0.00802	MEDAG	-169447	ALOX5AP	23266
chr13	32314913	32316388	17686	11673	-1.52	0.000325	0.000735	ZAR1L	-307	BRCA2	177
chr13	32537512	32539363	16308	9251	-1.76	4.36e-05	0.000372	N4BP2L2	447
chr13	33541876	33543585	11382	6181	-1.84	0.000406	0.000833	RFC3	-275318	STARD13	-256976
chr13	37000319	37001762	11916	7628	-1.56	0.00067	0.00111	ALG5	-1674	EXOSC8	500
chr13	39036323	39039441	33542	21353	-1.57	1.61e-05	0.000372	NHLRC3	-436
chr13	42991576	42993126	14337	9472	-1.51	0.000832	0.00128	DNAJC15	-30852	TNFSF11	418198
chr13	44434947	44437312	19597	12953	-1.51	0.000863	0.0013	SERP2	62288	TSC22D1	140435
chr13	44917609	44919101	9814	6374	-1.54	0.00354	0.00414	TSC22D1	-341790	NUFIP1	71128
chr13	45119673	45121494	19847	13011	-1.53	0.000211	0.000578	GTF2F2	69
chr13	46051747	46053373	15315	9409	-1.63	0.000114	0.000437	ZC3H13	186
chr13	46178904	46182712	25563	11128	-2.3	0.000189	0.000555	CPB2	-75782	LCP1	30540
chr13	49443173	49445552	20189	13015	-1.55	9.68e-05	0.000409	SETDB2	-11
chr13	50079652	50083152	31762	20012	-1.59	0.000157	0.000495	RNASEH2B	-828276	KCNRG	66148
chr13	52651689	52653741	16563	9791	-1.69	3.03e-05	0.000372	SUGT1	-124
chr13	72780872	72783143	20989	13949	-1.5	4.98e-05	0.000372	DIS3	-75	PIBF1	-51
chr13	77328851	77330546	14698	8700	-1.69	0.000118	0.000443	MYCBP2	-3020
chr13	94595230	94596512	13680	8698	-1.57	0.000445	0.000863	TGDS	386
chr13	97222073	97224566	17233	9146	-1.88	0.000668	0.00111	RAP2A	-210902	MBNL2	1024
chr14	21267315	21269587	17907	9119	-1.96	0.000413	0.000844	HNRNPC	974
chr14	21436551	21437979	12706	7440	-1.71	0.00078	0.00123	TOX4	-39490	CHD8	-5557
chr14	21455030	21456830	12291	7305	-1.68	0.000358	0.000781	CHD8	-24222	TOX4	-20825
chr14	21476171	21477955	19766	12769	-1.55	0.000113	0.000437	RAB2B	-90	TOX4	308
chr14	22588170	22590041	12621	7185	-1.76	0.00144	0.00194	DAD1	163
chr14	22829557	22830566	10820	7066	-1.53	0.00172	0.00224	MRPL52	179
chr14	22918376	22919752	12833	7508	-1.71	0.00066	0.00111	RBM23	120
chr14	30558569	30560021	17751	11571	-1.53	8.13e-05	0.000386	G2E3	172
chr14	30621593	30623126	15058	8938	-1.68	0.000126	0.000444	SCFD1	248
chr14	31560994	31562172	10757	6687	-1.61	0.000668	0.00111	NUBPL	188
chr14	34981289	34983946	25271	16316	-1.55	5.01e-05	0.000372	SRP54	661
chr14	35121382	35123569	25314	15324	-1.65	4.79e-05	0.000372	PPP2R3C	-163	KIAA0391	-94
chr14	35291826	35293497	14055	8841	-1.59	0.000295	0.000709	PSMA6	305
chr14	45083678	45085085	11555	7398	-1.56	0.000767	0.00122	PRPF39	283
chr14	45133633	45136698	29385	18214	-1.61	2.62e-05	0.000372	FANCM	-781	FKBP3	153
chr14	45251782	45253843	15450	9633	-1.6	9.85e-05	0.000409	MIS18BP1	589
chr14	49585601	49586622	9454	5798	-1.63	0.00244	0.00299	RPS29	264
chr14	49851825	49853452	18622	11808	-1.58	5.28e-05	0.000372	NEMF	564
chr14	51860329	51863103	20312	10365	-1.96	0.000112	0.000437	C14orf166	-127759	GNG2	1302
chr14	58243859	58245957	19670	10646	-1.85	5.73e-05	0.000372	PSMA3	77
chr14	58426576	58428606	21799	13516	-1.61	0.000127	0.000447	TIMM9	23	KIAA0586	206
chr14	60091155	60093147	23506	15135	-1.55	3.76e-05	0.000372	PCNX4	232
chr14	63641184	63642898	14040	8678	-1.62	0.000194	0.000562	PPP2R5E	-98667	SGPP1	85998
chr14	67358815	67361107	24743	16086	-1.54	8.48e-05	0.000393	EIF2S1	-36	ATP6V1D	288
chr14	67815759	67817045	11811	7170	-1.65	0.00239	0.00295	RAD51B	-3377	ZFYVE26	187
chr14	67819552	67820778	11363	6676	-1.7	0.00122	0.00169	ZFYVE26	-3576	RAD51B	386
chr14	69571720	69573536	7790	13142	1.69	0.00547	0.0061	SUSD6	-38968	SLC39A9	173936
chr14	70358794	70359983	13126	8736	-1.5	0.00114	0.0016	COX16	342
chr14	70599804	70601191	10815	6994	-1.55	0.00448	0.0051	MED6	192
chr14	73057765	73059626	18391	12129	-1.52	0.000166	0.000509	RBM25	260
chr14	74712255	74713875	14985	8845	-1.69	0.000212	0.000578	FCF1	-79	AREL1	50
chr14	77707270	77709046	20476	13317	-1.54	0.000321	0.000735	ALKBH1	-138	SLIRP	87
chr14	77760127	77761758	19056	11710	-1.63	8.12e-05	0.000386	SNW1	213
chr14	88005107	88007409	11784	5921	-1.99	0.00191	0.00241	GPR65	1134	KCNK10	316991
chr14	90331246	90332341	9155	6092	-1.5	0.00649	0.00717	NRDE2	343
chr14	101809457	101811307	12937	6826	-1.9	0.000469	0.000893	DYNC1H1	-154146	PPP2R5C	48584
chr14	105167251	105169431	10034	18480	1.84	0.00377	0.00439	JAG2	483
chr15	34334192	34338326	32920	21140	-1.56	0.00021	0.000578	SLC12A6	1493	EMC4	111260
chr15	40564178	40565551	12668	8432	-1.5	0.00166	0.00218	RPUSD2	-4435	CCDC32	115
chr15	41283676	41285149	16464	10974	-1.5	0.000807	0.00126	OIP5	48208	CHP1	53270
chr15	42272395	42274687	25093	15442	-1.62	3.37e-05	0.000372	GANC	-701	TMEM87A	122
chr15	42494983	42496351	13244	8515	-1.56	0.000751	0.0012	SNAP23	407
chr15	43105138	43106614	14675	8248	-1.78	7.88e-05	0.000386	UBR1	225
chr15	44426560	44428615	22218	14581	-1.52	1.7e-05	0.000372	CTDSPL2	354
chr15	49620278	49621842	10618	6143	-1.73	0.00107	0.00153	FGF7	197964	ATP8B4	498162
chr15	50423947	50425559	13574	8518	-1.59	0.000163	0.000507	USP8	371
chr15	58987105	58989239	23419	14634	-1.6	7.22e-05	0.000372	SLTM	-54519	RNF111	-42651
chr15	59687683	59689853	24079	15783	-1.53	4.08e-05	0.000372	BNIP2	766
chr15	64774690	64776381	9997	15686	1.57	0.00204	0.00258	RBPMS2	51
chr15	66503612	66505877	25112	13954	-1.8	5.6e-05	0.000372	ZWILCH	-214	RPL4	138
chr15	82750015	82751771	19724	13140	-1.5	0.000103	0.000416	AP3B2	-41114	FSD2	55176
chr15	84631191	84632803	9254	6110	-1.51	0.00801	0.0086	WDR73	22338	ZSCAN2	30992
chr15	92808015	92810430	15195	9593	-1.58	0.00184	0.00235	FAM174B	-153265	CHD2	-91097
chr15	92900028	92905474	39942	17533	-2.28	9.48e-05	0.000409	CHD2	2431	RGMA	171377
chr16	4115100	4117131	12239	19062	1.56	0.00738	0.00801	ADCY9	69
chr16	49281536	49282706	5948	10345	1.74	0.00423	0.00487	CBLN1	-290
chr16	70522609	70524541	22380	13444	-1.66	5.73e-05	0.000372	SF3B3	-213	COG4	-10
chr17	7685704	7689144	39350	25644	-1.53	0.000122	0.000444	TP53	114
chr17	16216809	16217940	10480	6511	-1.61	0.000926	0.00138	NCOR1	-1826	PIGL	165
chr17	16438296	16440485	19441	12840	-1.51	0.000401	0.00083	TRPV2	23849	ZNF287	129778
chr17	29928764	29931348	30959	20060	-1.54	0.000352	0.000773	SSH2	37
chr17	30116372	30117574	13046	7728	-1.69	0.000316	0.000732	NSRP1	192
chr17	31318083	31321803	16499	7151	-2.31	0.000576	0.00102	ENSG00000265118	-1112
chr17	31390968	31392552	7360	11270	1.53	0.00768	0.00827	RAB11FIP4	136
chr17	32265453	32267237	14377	21674	1.51	0.00379	0.00439	RHBDL3	169
chr17	32349580	32351877	19350	11382	-1.7	2.24e-05	0.000372	ZNF207	612
chr17	35567700	35568786	11877	7679	-1.55	0.000814	0.00126	SLFN14	-10145	PEX12	10394
chr17	35577688	35579332	15928	10466	-1.52	0.000523	0.000964	PEX12	127
chr17	38852492	38854245	16088	10507	-1.53	0.000697	0.00114	RPL23	474
chr17	39450516	39451583	9722	5745	-1.69	0.00199	0.00251	MED1	236
chr17	39863287	39864671	10093	6429	-1.57	0.0049	0.00552	ZPBP2	-4185	IKZF3	209
chr17	42458615	42460522	15142	9715	-1.56	0.00287	0.00343	ATP6V0A1	689
chr17	43124933	43126395	11373	7415	-1.53	0.00477	0.00539	BRCA1	-181
chr17	43169441	43172214	16973	11162	-1.52	0.00117	0.00163	NBR1	347
chr17	44186295	44188225	20549	13681	-1.5	0.000264	0.000659	TMUB2	211
chr17	45060531	45062111	17185	11105	-1.55	0.000311	0.000725	DCAKD	-212
chr17	48107039	48108675	20330	13209	-1.54	0.000165	0.000508	SNX11	299
chr17	49676588	49678491	15507	10052	-1.54	0.00162	0.00213	SPOP	570
chr17	50719151	50721738	25068	15726	-1.59	0.000125	0.000444	LUC7L3	846
chr17	59154240	59156239	18067	11296	-1.6	0.000201	0.000565	PRR11	-259	SKA2	29
chr17	59706942	59709025	22551	13979	-1.61	0.000344	0.000768	PTRH2	-358	VMP1	519
chr17	59963578	59965241	14329	9244	-1.55	0.000385	0.000816	RNFT1	309
chr17	64496124	64497637	16192	10438	-1.55	0.000229	0.000607	POLG2	155
chr17	67717281	67718972	14561	9315	-1.56	0.000402	0.00083	NOL11	294
chr17	69414348	69416190	9993	6013	-1.66	0.00245	0.00299	MAP2K6	571
chr17	75666473	75668075	18081	12029	-1.5	0.000291	0.000706	RECQL5	-85	SAP30BP	158
chr17	76239621	76241495	13364	20493	1.53	0.00728	0.00792	RNF157	-185
chr17	78734855	78737157	14329	8561	-1.67	0.000444	0.000863	DNAH17	-158612	CYTH1	46288
chr18	2570471	2572216	18671	12217	-1.53	0.000251	0.000642	NDC80	-167	METTL4	142
chr18	3245735	3249635	37355	23716	-1.58	9.25e-05	0.000409	MYL12A	-4590
chr18	9101914	9104503	18037	9773	-1.85	6.93e-05	0.000372	NDUFV2	579
chr18	11849950	11852572	27276	17149	-1.59	3.52e-05	0.000372	CHMP1B	-135
chr18	35289335	35290879	14343	9049	-1.59	0.000382	0.000816	ZSCAN30	125
chr18	35497006	35498285	10814	7142	-1.51	0.00217	0.00271	ENSG00000267140	294	INO80C	297
chr18	74147247	74149152	19384	12234	-1.58	0.000132	0.000455	FBXO15	-335	TIMM21	-311
chr19	8334531	8335837	6857	11254	1.64	0.00593	0.00658	ANGPTL4	-28967	RPS28	13684
chr19	9434542	9435939	12319	7975	-1.54	0.000595	0.00103	ZNF266	-14496	ZNF560	63366
chr19	12994906	12996654	8774	13173	1.5	0.0076	0.00821	NFIX	172
chr19	14381091	14382611	9203	6087	-1.51	0.00656	0.0072	ADGRE5	407
chr19	18895112	18896605	5190	9172	1.77	0.00936	0.00997	GDF1	237	CERS1	285
chr19	41309823	41311007	13831	9088	-1.52	0.000484	0.000911	CCDC97	226
chr19	41363332	41364810	11719	7431	-1.58	0.00107	0.00153	B9D2	102
chr19	41396590	41398778	17864	11344	-1.57	0.000401	0.00083	EXOSC5	-205	BCKDHA	224
chr19	43934447	43935902	11639	7726	-1.51	0.0027	0.00325	ZNF45	84
chr19	49487219	49488725	17691	11314	-1.56	0.000627	0.00107	RPL13A	418
chr19	49495914	49497448	12632	7819	-1.62	0.000826	0.00127	RPS11	307
chr20	2692060	2694150	12190	18970	1.56	0.00476	0.00539	EBF4	227
chr20	18566742	18568121	13713	8002	-1.71	0.00071	0.00115	SMIM26	12
chr20	34516134	34517180	16995	11211	-1.52	8.68e-05	0.000394	DYNLRB1	248
chr20	35741291	35743384	19594	11852	-1.65	6.56e-05	0.000372	RBM39	-387
chr20	35771802	35773794	14472	9603	-1.51	0.00174	0.00225	PHF20	815
chr20	49812216	49813885	18643	12243	-1.52	7.39e-05	0.000372	SLC9A8	338
chr20	63831028	63832444	7906	12048	1.52	0.00762	0.00822	ZBTB46	-40813	ABHD16B	-29762
chr20	64048078	64049991	5610	9837	1.75	0.00793	0.00853	SOX18	606
chr21	29024238	29025687	13218	8612	-1.53	0.000758	0.00121	USP16	312
chr21	33541490	33544925	36083	21193	-1.7	1.61e-05	0.000372	GART	-366	SON	590
chr21	35045755	35049718	30267	18232	-1.66	9.61e-05	0.000409	RUNX1	1607	CLIC6	378348
chr22	20425202	20426318	6245	10483	1.68	0.00313	0.00373	SCARF2	12066	ZNF74	31645
chr22	20436264	20438468	10167	15915	1.57	0.00583	0.00648	SCARF2	460
chr22	26672024	26675159	18126	11980	-1.51	0.00563	0.00626	CRYBA4	51628
chr22	38454505	38456308	11985	18785	1.57	0.00652	0.00718	KCNJ4	-208
chr22	38842992	38844521	8094	13711	1.69	0.00757	0.00819	NPTXR	225
chr22	39900786	39903389	12593	6527	-1.93	0.000501	0.000934	TNRC6B	-275837	GRAP2	1006
chr22	40461922	40463902	13737	6604	-2.08	0.000276	0.000674	MKL1	70968	SGSM3	92301
chr22	50260843	50262156	7356	11134	1.51	0.00818	0.00876	MAPK12	325
chrX	12973490	12976762	19364	12126	-1.6	9.79e-05	0.000409	TMSB4X	16
chrX	23783136	23784527	8678	5175	-1.68	0.00123	0.0017	SAT1	659
chrX	46836685	46838451	11118	7267	-1.53	0.000439	0.000861	RP2	628
chrX	71532078	71535489	20487	12623	-1.62	0.000126	0.000444	OGT	701
chrX	74291443	74293785	14245	9264	-1.54	0.000707	0.00115	ZCCHC13	-11576	CHIC1	729406
chrX	74613388	74615037	8896	5640	-1.58	0.00269	0.00325	RLIM	404
chrX	78103676	78106708	14948	9156	-1.63	0.00112	0.00158	PGK1	1018	TAF9B	34514
chrX	80807794	80809687	12251	7754	-1.58	0.000854	0.0013	BRWD3	947
chrX	101407060	101409293	9905	5798	-1.71	0.00142	0.00191	GLA	-252	HNRNPH2	-118
chrX	103685993	103688078	8018	4655	-1.72	0.00153	0.00203	MORF4L2	-218
chrX	108090638	108092371	8706	5259	-1.66	0.00206	0.00259	ATG4A	-163	PSMD10	113
chrX	118345450	118347782	14647	9623	-1.52	0.000305	0.000718	WDR44	507
chrX	119790377	119792319	11463	7501	-1.53	0.000775	0.00122	RPL39	295
chrX	119870227	119872329	12533	7746	-1.62	0.00107	0.00153	NDUFA1	-209	RNF113A	549
chrX	120559410	120562131	12479	7980	-1.56	0.000576	0.00102	LAMP2	-91406	CUL4B	15023
chrX	123859425	123861342	11191	7094	-1.58	0.00045	0.000867	XIAP	357
chrX	123960694	123963870	19746	11334	-1.74	4.09e-05	0.000372	SH2D1A	-384062	STAG2	1763
chrX	136879516	136881110	10200	6126	-1.66	0.000945	0.0014	RBMX	412
chrY	12904292	12906591	13360	8248	-1.62	0.000189	0.000555	DDX3Y	1334	UTY	575228
chrY	13478088	13480452	14721	9083	-1.62	0.00015	0.00048	UTY	1400	DDX3Y	575162
